# Supplementary material for: Avian malaria-mediated population decline of a widespread iconic bird species
Source: R Soc Open Sci. 2019 Jul 17;6(7):182197. doi: 10.1098/rsos.182197 (PMC6689627; doi:10.1098/rsos.182197)
Supplement: Clammas_08_09_2ages [file rsos182197supp7.csv]

RING	Year	AGE	Site	OCT	NOV	DEC	JAN	FEB	MAR
TH54157	2007	4	CLA
TH54158	2007	4	CLA	1	0	0	0	0	0
TH54187	2007	3	CLA
TH54188	2007	3	CLA
TH54189	2007	3	CLA
TH54190	2007	4	CLA
TH54191	2007	3	CLA
TH54192	2007	4	CLA
TH54195	2007	3	CLA
TH54194	2007	3	CLA
TH54196	2007	3	CLA
TH54197	2007	3	CLA
TH54198	2007	3	CLA
TH54199	2007	3	CLA
TH54200	2007	3	CLA
TK72801	2007	4	CLA
TK72802	2007	3	CLA
TK72803	2007	4	CLA
TK72804	2007	3	CLA	1	1	1	1	1	1
TK72828	2007	4	CLA
TK72829	2007	4	CLA
TK72830	2007	3	CLA
TK72831	2007	3	CLA
TK72832	2007	3	CLA
TK72833	2007	4	CLA	0	0	1	1	1	1
TK72834	2007	4	CLA	0	1	1	1	1	1
TK72835	2007	4	CLA	1	0	0	0	0	0
TK72836	2007	4	CLA
TK72844	2007	3	CLA
TK72845	2007	3	CLA
TK72846	2007	3	CLA	0	0	0	0	0	0
TK72865	2007	4	CLA
TK72869	2007	3	CLA	0	1	0	0	0	0
TK72870	2007	3	CLA
TK72871	2007	3	CLA
TK72872	2007	3	CLA
TK72873	2007	3	CLA
TJ43010	2007	3	CLA
TJ43011	2007	3	CLA
TJ43013	2007	3	CLA
TJ43012	2007	3	CLA
TJ43014	2007	3	CLA
TJ43015	2007	3	CLA
TJ43016	2007	3	CLA
TJ43153	2007	4	CLA
TJ43154	2007	4	CLA
TJ43155	2007	4	CLA
TJ43156	2007	4	CLA	0	0	0	1	1	0
TJ43157	2007	4	CLA
TJ43158	2007	4	CLA
TJ43159	2007	4	CLA
TJ43160	2007	4	CLA
TJ43161	2007	4	CLA
TJ43183	2007	4	CLA	1	0	1	1	0	1
TJ43184	2007	4	CLA	1	1	0	0	0	0
TJ43185	2007	4	CLA	0	0	0	0	0	0
TJ43186	2007	4	CLA	1	1	0	1	0	1
TJ43187	2007	4	CLA	1	1	1	0	1	0
TJ43229	2008	4	CLA
TJ43230	2008	4	CLA
TJ43231	2008	4	CLA
TJ43232	2008	4	CLA
TJ43233	2008	4	CLA	1	1	1	1	1	1
TJ43234	2008	4	CLA
TJ43235	2008	4	CLA	1	1	1	0	1	0
TJ43273	2008	4	CLA
TJ43274	2008	4	CLA
TJ43275	2008	4	CLA
TJ43277	2008	4	CLA
TJ43279	2008	3	CLA
TJ43297	2008	4	CLA
TJ43280	2008	3	CLA
TJ43281	2008	3	CLA
TJ43282	2008	3	CLA
TJ43283	2008	4	CLA	0	1	0	1	1	1
TJ43284	2008	3	CLA
TJ43285	2008	3	CLA
TJ43286	2008	3	CLA
TJ43291	2008	3	CLA
TJ43292	2008	3	CLA
TJ43293	2008	3	CLA	0	0	1	0	0	0
TJ43294	2008	3	CLA	0	0	1	0	0	0
TJ43295	2008	3	CLA
TJ43296	2008	3	CLA
TJ43287	2008	3	CLA
TJ43289	2008	3	CLA
TJ43288	2008	4	CLA
TJ43290	2008	4	CLA
TL17019	2008	3	CLA
TL17020	2008	3	CLA
TL17021	2008	3	CLA	0	1	0	0	0	0
TL17022	2008	3	CLA	1	1	0	0	0	0
TL17023	2008	3	CLA
TL17076	2008	3	CLA
TL17259	2008	3	CLA
TL17261	2008	3	CLA	1	1	0	0	0	0
TL17262	2008	3	CLA
TL17263	2008	3	CLA
TL17264	2008	3	CLA
TL17281	2008	3	CLA
TL17282	2008	3	CLA
TL17283	2008	3	CLA
TL17284	2008	3	CLA
TL17285	2008	3	CLA	1	0	0	1	0	0
TL17088	2008	4	CLA	0	1	1	1	1	1
TL17149	2008	4	CLA	0	0	0	1	0	1
TL17150	2008	4	CLA	0	0	1	0	1	1
TL17151	2008	4	CLA	0	0	0	0	0	1
TL17152	2008	4	CLA	0	0	1	0	0	1
TL17153	2008	4	CLA	0	0	1	1	0	1
TL17159	2008	4	CLA	0	0	0	1	1	1
TL17160	2008	4	CLA	0	0	0	0	0	0
TL17095	2009	4	CLA	0	0	0	0	0	1
