# Supplementary material for: Avian malaria-mediated population decline of a widespread iconic bird species
Source: R Soc Open Sci. 2019 Jul 17;6(7):182197. doi: 10.1098/rsos.182197 (PMC6689627; doi:10.1098/rsos.182197)
Supplement: St Barnabas_07_08_2ages [file rsos182197supp14.csv]

RING	Year	AGE	Site	SEP	OCT	NOV	DEC	JAN	FEB	MAR
TJ43018	2007	3	STB
TJ43019	2007	4	STB
TJ43020	2007	3	STB	0	0	1	0	0	0	0
TJ43021	2007	3	STB
TJ43023	2007	3	STB
TJ43024	2007	3	STB	1	1	1	1	1	1	0
TJ43025	2007	3	STB
TJ43026	2007	3	STB	1	1	1	1	1	1	1
TJ43028	2007	3	STB
TJ43029	2007	3	STB
TJ43030	2007	3	STB	1	1	1	1	0	1	1
TJ43031	2007	3	STB	1	1	1	1	0	0	0
TJ43032	2007	3	STB
TJ43033	2007	4	STB	1	0	1	0	0	0	0
TJ43034	2007	3	STB
TJ43035	2007	3	STB
TJ43036	2007	3	STB
TJ43037	2007	3	STB	1	1	1	1	1	1	1
TJ43038	2007	3	STB
TJ43046	2007	3	STB	1	0	0	0	0	0	0
TJ43047	2007	3	STB
TJ43049	2007	3	STB	1	0	1	1	0	0	0
TJ43050	2007	3	STB
TJ43051	2007	3	STB
TJ43052	2007	3	STB
TJ43053	2007	4	STB
TJ43054	2007	3	STB	0	0	1	0	0	0	0
TJ43055	2007	3	STB	1	1	0	0	0	0	0
TJ43056	2007	3	STB
TJ43057	2007	3	STB	1	1	1	0	0	1	1
TJ43058	2007	3	STB	1	1	1	1	1	0	0
TJ43059	2007	3	STB
TJ43060	2007	3	STB
TJ43061	2007	4	STB	1	1	1	1	1	1	1
TJ43062	2007	3	STB	1	1	0	0	1	0	1
TJ43064	2007	3	STB
TJ43065	2007	3	STB	1	1	1	1	1	1	1
TJ43066	2007	3	STB	1	1	1	1	1	0	1
TJ43067	2007	3	STB	1	1	1	1	1	1	1
TJ43068	2007	3	STB
TJ43070	2007	3	STB	1	1	0	0	0	0	0
TJ43071	2007	3	STB
TJ43072	2007	3	STB
TJ43073	2007	3	STB
TJ43074	2007	3	STB	0	0	0	0	0	1	0
TJ43075	2007	3	STB	0	0	0	0	0	1	0
TJ43076	2007	4	STB	1	1	1	1	1	0	0
TJ43104	2007	3	STB	0	1	1	1	1	1	1
TJ43105	2007	4	STB	0	1	1	0	0	0	0
TJ43106	2007	4	STB	0	1	0	0	0	0	0
TJ43108	2007	4	STB	0	1	1	1	1	0	1
TJ43109	2007	4	STB	0	1	0	1	1	0	1
TJ43110	2007	4	STB	0	1	1	1	1	1	1
TJ43111	2007	4	STB	0	1	1	1	1	1	0
TJ43112	2007	4	STB	0	1	0	1	0	0	0
TJ43113	2007	4	STB	0	1	1	1	1	0	0
TJ43114	2007	4	STB	0	1	1	1	1	1	1
TJ43049	2007	4	STB	0	0	1	0	0	0	0
TJ43060	2007	4	STB	0	0	1	1	1	0	1
TJ43162	2007	4	STB	0	0	1	1	1	1	1
TJ43163	2007	4	STB	0	0	1	0	1	0	1
TJ43164	2007	4	STB	0	0	1	0	1	0	0
TJ43165	2007	4	STB	0	0	1	1	1	0	0
TJ43166	2007	4	STB	0	0	1	1	1	0	0
TJ43167	2007	4	STB	0	0	1	1	1	1	1
TJ43170	2007	4	STB	0	0	1	0	0	0	0
TJ43188	2007	4	STB	0	0	0	1	1	1	0
TJ43189	2007	4	STB	0	0	0	1	0	1	1
TJ43190	2007	4	STB	0	0	0	1	1	0	0
TJ43191	2007	4	STB	0	0	0	1	0	0	0
TJ43192	2007	4	STB	0	0	0	1	1	0	1
TJ43193	2007	4	STB	0	0	0	1	1	1	1
TJ43197	2007	4	STB	0	0	0	1	0	0	0
TJ43198	2007	4	STB	0	0	0	1	0	0	0
TJ43199	2007	4	STB	0	0	0	1	1	0	0
TJ43200	2007	4	STB	0	0	0	1	0	0	1
TJ43202	2007	4	STB	0	0	0	1	0	0	0
TJ43204	2008	4	STB	0	0	0	0	1	0	0
TJ43205	2008	4	STB	0	0	0	0	1	1	0
TJ43206	2008	4	STB	0	0	0	0	1	0	0
TJ43207	2008	4	STB	0	0	0	0	1	1	0
TJ43208	2008	4	STB	0	0	0	0	1	1	0
TJ43209	2008	4	STB	0	0	0	0	1	0	0
TJ43210	2008	4	STB	0	0	0	0	1	0	0
TJ43211	2008	4	STB	0	0	0	0	1	1	1
TJ43212	2008	4	STB	0	0	0	0	1	0	0
TJ43213	2008	4	STB	0	0	0	0	1	0	0
TJ43217	2008	4	STB	0	0	0	0	1	1	1
TJ43218	2008	4	STB	0	0	0	0	1	0	0
TJ43219	2008	4	STB	0	0	0	0	1	0	0
TJ43220	2008	4	STB	0	0	0	0	1	1	1
TJ43248	2008	4	STB	0	0	0	0	0	1	0
TJ43249	2008	4	STB	0	0	0	0	0	1	0
