# Supplementary material for: Avian malaria-mediated population decline of a widespread iconic bird species
Source: R Soc Open Sci. 2019 Jul 17;6(7):182197. doi: 10.1098/rsos.182197 (PMC6689627; doi:10.1098/rsos.182197)
Supplement: St Barnabas_08_09_2ages [file rsos182197supp15.csv]

RING	Year	AGE	Site	SEP	OCT	NOV	DEC	JAN	FEB
TJ43058	2007	3	STB	1	1	1	0	1	0
TJ43066	2007	3	STB	1	1	1	1	0	1
TJ43073	2007	3	STB
TJ43075	2007	3	STB	0	0	0	0	1	1
TJ43061	2007	4	STB
TJ43068	2007	3	STB	1	1	1	1	1	1
TJ43067	2007	3	STB
TJ43074	2007	3	STB
TJ43064	2007	3	STB
TJ43071	2007	3	STB
TJ43062	2007	3	STB
TJ43070	2007	3	STB
TJ43065	2007	3	STB
TJ43072	2007	3	STB
TJ43104	2007	3	STB
TJ43105	2007	4	STB
TJ43106	2007	4	STB
TJ43054	2007	3	STB
TJ43108	2007	4	STB	1	0	0	0	0	0
TJ43059	2007	3	STB
TJ43109	2007	4	STB
TJ43056	2007	3	STB
TJ43110	2007	4	STB
TJ43055	2007	3	STB
TJ43111	2007	4	STB
TL17318	2008	3	STB
TJ43057	2007	3	STB
TJ43112	2007	4	STB
TL17319	2008	3	STB	1	1	0	1	1	1
TJ43248	2008	4	STB
TJ43249	2008	4	STB
TL17320	2008	3	STB
TL17322	2008	3	STB	0	0	1	1	0	0
TL17323	2008	3	STB	1	1	1	1	1	1
TL17324	2008	3	STB
TL17325	2008	3	STB
TL17326	2008	3	STB
TL17327	2008	3	STB
TL17328	2008	3	STB	1	0	0	0	0	0
TL17329	2008	3	STB	1	1	1	1	0	1
TL17330	2008	3	STB	0	1	1	1	0	0
TL17331	2008	3	STB
TL17332	2008	3	STB
TL17333	2008	3	STB	1	1	1	1	1	1
TL17334	2008	3	STB
TL17335	2008	3	STB
TJ43113	2007	4	STB
TJ43114	2007	4	STB
TL17346	2008	3	STB
TL17347	2008	3	STB
TL17348	2008	3	STB	1	0	1	0	0	0
TL17349	2008	3	STB
TL17350	2008	4	STB
TL17351	2008	3	STB
TL17352	2008	3	STB
TL17353	2008	3	STB
TL17354	2008	3	STB	1	1	0	0	0	0
TL17355	2008	3	STB
TL17356	2008	3	STB	1	1	1	1	1	0
TL17357	2008	3	STB
TL17358	2008	3	STB	1	1	1	1	1	1
TL17359	2008	3	STB
TL17362	2008	3	STB	1	1	1	1	1	1
TL17363	2008	3	STB	1	1	1	1	0	0
TL17346	2008	3	STB
TL17365	2008	3	STB	0	1	0	1	1	1
TL17366	2008	3	STB
TL17367	2008	3	STB
TL17368	2008	3	STB	1	1	0	0	0	0
TL17369	2008	3	STB	1	1	1	1	0	0
TL17370	2008	3	STB
TL17373	2008	3	STB
TL17374	2008	3	STB
TL17375	2008	3	STB	1	1	1	0	0	0
TL17376	2008	3	STB
TL17377	2008	3	STB
TL17378	2008	3	STB
TL17379	2008	3	STB	1	1	0	1	0	1
TJ43049	2007	4	STB
TJ43060	2007	4	STB			1	0	0	0
TJ43162	2007	4	STB	1	1	1	1	1	1
TJ43163	2007	4	STB
TJ43164	2007	4	STB
TJ43165	2007	4	STB
TJ43166	2007	4	STB
TJ43167	2007	4	STB	0	1	1	1	1	1
TJ43170	2007	4	STB
TJ43299	2008	3	STB
TL17001	2008	3	STB
TL17002	2008	4	STB	0	0	1	0	0	0
TL17003	2008	4	STB	0	1	1	1	1	1
TJ43061	2008	4	STB
TL17004	2008	3	STB
TL17006	2008	3	STB	0	1	0	0	0	0
TL17005	2008	3	STB
TL17008	2008	3	STB	1	1	1	1	0	1
TL17009	2008	3	STB
TL17011	2008	3	STB
TL17012	2008	3	STB	0	0	0	1	1	1
TL17013	2008	3	STB	1	1	1	1	1	0
TJ43076	2007	4	STB
TL17015	2008	4	STB
TL17016	2008	4	STB	1	1	1	0	0	0
TL17034	2008	3	STB	0	1	0	0	0	0
TJ43188	2007	4	STB
TL17035	2008	3	STB	0	1	0	0	0	0
TJ43189	2007	4	STB
TL17036	2008	3	STB	0	1	1	1	1	0
TJ43030	2007	3	STB					1	0
TJ43190	2007	4	STB	0	1	1	0	1	0
TL17380	2008	3	STB
TL17038	2008	3	STB
TL17039	2008	3	STB
TL17040	2008	3	STB	1	1	0	0	0	0
TL17041	2008	3	STB
TL17043	2008	3	STB	0	0	0	0	0	1
TL17045	2008	3	STB	1	1	1	1	1	1
TL17046	2008	4	STB
TL17381	2008	3	STB	1	1	0	1	0	1
TL17047	2008	3	STB	0	1	0	0	0	0
TL17048	2008	3	STB
TJ43036	2007	3	STB	0	1	1	0	0	0
TL17049	2008	3	STB
TJ43191	2007	4	STB
TJ43032	2007	3	STB
TJ43037	2007	3	STB	1	0	1	1	1	1
TJ43034	2007	3	STB
TL17382	2008	4	STB	1	0	0	0	0	0
TJ43033	2007	4	STB
TJ43035	2007	3	STB
TJ43192	2007	4	STB
TL17050	2008	3	STB	0	1	0	1	0	0
TJ43193	2007	4	STB	1	1	1	1	1	1
TJ43197	2007	4	STB
TJ43198	2007	4	STB	0	1	0	0	1	0
TJ43199	2007	4	STB	0	1	1	1	1	0
TJ43200	2007	4	STB
TL17383	2008	4	STB
TJ43202	2007	4	STB
TJ43025	2007	3	STB	0	1	0	0	0	0
TL17384	2008	3	STB	1	1	0	0	0	0
TJ43031	2007	3	STB
TJ43204	2008	4	STB
TJ43028	2007	3	STB
TJ43205	2008	4	STB	0	1	1	1	1	1
TJ43026	2007	3	STB	1	1	1	1	1	1
TJ43206	2008	4	STB
TL17287	2008	4	STB
TJ43029	2007	3	STB
TJ43207	2008	4	STB
TL17290	2008	3	STB	1	0	0	0	1	0
TJ43208	2008	4	STB
TJ43209	2008	4	STB	0	0	0	0	0	1
TJ43024	2007	3	STB
TJ43210	2008	4	STB
TJ43023	2007	3	STB
TJ43020	2007	3	STB
TJ43018	2007	3	STB
TJ43021	2007	3	STB
TJ43211	2008	4	STB	0	0	1	1	1	0
TJ43212	2008	4	STB
TJ43213	2008	4	STB
TJ43217	2008	4	STB
TJ43218	2008	4	STB
TJ43219	2008	4	STB
TJ43220	2008	4	STB	0	1	1	1	1	1
TL17291	2008	3	STB	1	1	0	0	0	0
TL17292	2008	3	STB	1	1	1	0	0	0
TJ43051	2007	3	STB
TJ43053	2007	4	STB
TJ43050	2007	3	STB
TJ43052	2007	3	STB
TJ43046	2007	3	STB
TJ43047	2007	3	STB
TJ43038	2007	3	STB
TJ43019	2007	4	STB
TJ43049	2007	3	STB
TJ43300	2008	4	STB
TJ43060	2007	3	STB
TL17017	2008	3	STB
TL17102	2008	4	STB	0	1	0	0	0	0
TL17103	2008	4	STB	0	1	0	0	0	0
TL17104	2008	4	STB	0	1	0	0	0	1
TL17105	2008	4	STB	0	1	0	0	0	0
TL17106	2008	4	STB	0	1	1	1	1	1
TL17107	2008	4	STB	0	1	0	0	0	0
TL17109	2008	4	STB	0	1	0	0	0	0
TL17110	2008	4	STB	0	1	0	0	0	0
TL17113	2008	4	STB	0	1	1	1	1	1
TL17142	2008	4	STB	0	0	1	1	1	1
TL17143	2008	4	STB	0	0	1	0	0	0
TL17144	2008	4	STB	0	0	1	0	0	0
TL17145	2008	4	STB	0	0	1	1	1	0
TL17146	2008	4	STB	0	0	1	0	0	0
TL17148	2008	4	STB	0	0	1	0	0	0
TJ43053	2008	4	STB	0	0	0	1	0	0
TL17162	2008	4	STB	0	0	0	1	1	1
TL17163	2008	4	STB	0	0	0	1	0	0
TL17165	2009	4	STB	0	0	0	0	1	0
