# Supplementary material for: Avian malaria-mediated population decline of a widespread iconic bird species
Source: R Soc Open Sci. 2019 Jul 17;6(7):182197. doi: 10.1098/rsos.182197 (PMC6689627; doi:10.1098/rsos.182197)
Supplement: Table S3 [file rsos182197supp2.xlsx]

## Sheet: Foglio1
Ring	Site	Year	Age	Plasmodium microscopy	Atoxoplasma microscopy	Isospora microscopy	Ring	Site	Year	Age	Plasmodium microscopy	Atoxoplasma microscopy	Isospora microscopy
TH54100	H	2006	Adult	NA	NA	NA	TH54155	K	2007	Adult	NA	NA	NA
TH54101	H	2006	Adult	NA	NA	NA	TH54156	K	2007	Adult	NA	NA	POS
TH54102	H	2006	Adult	NA	NA	NA	TH54165	K	2007	Adult	NEG	NEG	NEG
TH54103	H	2006	Adult	NA	NA	NA	TH54166	K	2007	Adult	POS	NEG	NEG
TH54104	H	2006	Adult	NA	NA	NA	TH54167	K	2007	Adult	NEG	NEG	NA
TH54105	H	2006	Adult	NA	NA	NA	TJ43004	K	2007	Adult	NEG	NEG	NEG
TH54108	H	2006	Adult	NA	NA	NA	TJ43103	K	2007	Adult	POS	NEG	NEG
TH54113	H	2006	Adult	NA	NA	NA	TJ43171	K	2007	Adult	POS	POS	NA
TH54114	H	2006	Adult	NA	NA	NA	TJ43172	K	2007	Adult	POS	NEG	NA
TH54115	H	2006	Adult	NA	NA	NA	TJ43173	K	2007	Adult	NEG	NEG	NA
TH54116	H	2006	Adult	NA	NA	NA	TJ43174	K	2007	Adult	NEG	NEG	NA
TH54074	K	2006	Adult	NA	NA	NA	TJ43203	K	2007	Adult	NEG	POS	NEG
TH54127	K	2006	Adult	NA	NA	NA	TK72826	K	2007	Adult	POS	NEG	NEG
TH54128	K	2006	Adult	NA	NA	NA	TK72827	K	2007	Juv	POS	POS	NEG
TH54129	K	2006	Adult	NA	NA	NA	TK72895	K	2007	Juv	POS	NEG	NEG
TH54130	K	2006	Adult	NA	NA	NA	TK72896	K	2007	Juv	POS	NEG	NA
TH54131	K	2006	Adult	NA	NA	NA	TK72897	K	2007	Juv	POS	POS	NA
TH54132	K	2006	Adult	NA	NA	NA	TK72898	K	2007	Juv	POS	NEG	NEG
TH54133	K	2006	Adult	NA	NA	NA	TK72899	K	2007	Juv	POS	POS	NEG
TH54134	K	2006	Adult	NA	NA	NA	TK72882	G	2007	Juv	POS	NEG	NEG
TH54135	K	2006	Adult	NA	NA	NA	TJ43245	F	2008	Adult	POS	NEG	NEG
TH54136	K	2006	Adult	NA	NA	NA	TJ43246	F	2008	Adult	NEG	NEG	NEG
TH54137	K	2006	Adult	NA	NA	NA	TJ43247	F	2008	Adult	POS	NEG	NEG
TJ43089	F	2007	Adult	POS	NEG	NA	TL17219	F	2008	Adult	NEG	NEG	NEG
TJ43091	F	2007	Adult	POS	NEG	NA	TL17220	F	2008	Juv	POS	NEG	NEG
TJ43141	F	2007	Adult	POS	NEG	NA	TL17221	F	2008	Adult	NEG	POS	NEG
TJ43142	F	2007	Adult	POS	NEG	NA	TL17238	F	2008	Juv	POS	NEG	NEG
TJ43143	F	2007	Juv	POS	POS	NA	TL17239	F	2008	Juv	POS	NEG	NEG
TJ43144	F	2007	Adult	POS	POS	NA	TL17240	F	2008	Juv	POS	NEG	NEG
TJ43145	F	2007	Adult	NEG	NEG	NA	TL17241	F	2008	Juv	POS	POS	NEG
TJ43146	F	2007	Adult	POS	NEG	NEG	TJ43254	A	2008	Adult	POS	NEG	NA
TJ43147	F	2007	Adult	POS	POS	NA	TJ43255	A	2008	Adult	POS	NEG	NA
TJ43148	F	2007	Adult	POS	POS	NA	TJ43256	A	2008	Adult	POS	NEG	NA
TJ43149	F	2007	Adult	POS	POS	NA	TJ43257	A	2008	Adult	POS	NEG	NA
TJ43150	F	2007	Adult	POS	NEG	NA	TJ43258	A	2008	Adult	POS	NEG	NA
TJ43151	F	2007	Adult	POS	POS	NEG	TL17231	A	2008	Juv	POS	NEG	NA
TJ43152	F	2007	Adult	POS	POS	NEG	TL17232	A	2008	Juv	POS	POS	NA
TK72883	F	2007	Adult	POS	NEG	NA	TL17233	A	2008	Juv	POS	NEG	NA
TK72884	F	2007	Adult	NEG	POS	NA	TL17234	A	2008	Adult	NEG	POS	NEG
TK72885	F	2007	Adult	NEG	NEG	NA	TL17235	A	2008	Juv	POS	POS	NEG
TK72886	F	2007	Juv	POS	NEG	NEG	TL17236	A	2008	Juv	NA	NEG	NA
TK72887	F	2007	Juv	POS	POS	NEG	TH54055	H	2008	Adult	NEG	NEG	NA
TK72888	F	2007	Juv	POS	NEG	NA	TH54110	H	2008	Adult	POS	NEG	NA
TK72889	F	2007	Juv	POS	POS	NEG	TH54112	H	2008	Adult	POS	NEG	NEG
TK72890	F	2007	Juv	NEG	POS	NEG	TH54178	H	2008	Adult	NEG	NEG	NEG
TK72891	F	2007	Juv	POS	NEG	NEG	TJ43177	H	2008	Adult	POS	NEG	NEG
TK72892	F	2007	Juv	POS	NEG	NEG	TJ43250	H	2008	Adult	NEG	NEG	NA
TK72893	F	2007	Juv	POS	NEG	NEG	TJ43251	H	2008	Adult	NEG	NEG	NA
TK72894	F	2007	Juv	POS	NEG	NEG	TJ43261	H	2008	Adult	POS	NEG	NA
TJ43039	H	2007	Juv	NA	NA	NA	TJ43262	H	2008	Adult	POS	NEG	NEG
TJ43040	H	2007	Juv	POS	NEG	NA	TL17070	H	2008	Juv	POS	NEG	NA
TJ43041	H	2007	Juv	POS	NEG	NEG	TL17071	H	2008	Adult	POS	NEG	NA
TJ43042	H	2007	Juv	POS	NEG	NEG	TL17072	H	2008	Adult	POS	POS	NA
TJ43043	H	2007	Juv	POS	NEG	POS	TL17075	H	2008	Adult	NA	NA	NA
TJ43044	H	2007	Juv	POS	NEG	NEG	TL17114	H	2008	Adult	POS	NEG	NA
TJ43045	H	2007	Juv	NEG	NEG	NEG	TL17115	H	2008	Adult	NEG	NEG	NA
TJ43116	H	2007	Adult	POS	NA	NA	TL17116	H	2008	Adult	POS	NEG	NA
TJ43117	H	2007	Adult	POS	NEG	NA	TL17117	H	2008	Adult	POS	NEG	NA
TJ43118	H	2007	Adult	POS	NEG	NA	TL17118	H	2008	Adult	POS	NEG	NA
TJ43119	H	2007	Adult	NA	NA	NA	TL17119	H	2008	Adult	POS	NEG	NA
TJ43120	H	2007	Adult	POS	NEG	NA	TL17120	H	2008	Adult	POS	NEG	NA
TJ43121	H	2007	Adult	POS	NEG	NA	TL17121	H	2008	Adult	NA	NA	NA
TJ43122	H	2007	Adult	NA	NA	NA	TL17122	H	2008	Adult	NEG	NEG	NA
TJ43123	H	2007	Adult	NA	NA	NA	TL17123	H	2008	Adult	POS	NEG	NA
TJ43124	H	2007	Adult	NA	NA	NEG	TL17124	H	2008	Adult	POS	NEG	NA
TJ43125	H	2007	Adult	NA	NA	NA	TL17125	H	2008	Adult	POS	NEG	NA
TJ43126	H	2007	Adult	NA	NA	NEG	TL17204	H	2008	Juv	POS	NEG	NA
TJ43127	H	2007	Adult	NA	NA	NA	TL17205	H	2008	Juv	POS	NEG	NEG
TJ43128	H	2007	Adult	NA	NA	NEG	TL17206	H	2008	Juv	POS	NEG	NA
TJ43129	H	2007	Adult	NA	NA	NEG	TL17207	H	2008	Juv	POS	POS	NEG
TJ43130	H	2007	Adult	NA	NA	NEG	TL17208	H	2008	Juv	POS	NEG	NEG
TJ43131	H	2007	Adult	NA	NA	NEG	TL17209	H	2008	Adult	NEG	NEG	NEG
TJ43132	H	2007	Adult	NA	NA	NEG	TL17210	H	2008	Adult	POS	NEG	NEG
TK72805	H	2007	Juv	POS	NEG	NEG	TL17211	H	2008	Adult	POS	NEG	NEG
TK72806	H	2007	Juv	POS	NEG	POS	TL17212	H	2008	Juv	POS	NEG	NA
TK72807	H	2007	Juv	POS	NEG	NA	TL17213	H	2008	Juv	POS	NEG	NEG
TK72808	H	2007	Juv	POS	NEG	NEG	TL17214	H	2008	Adult	POS	NEG	NEG
TK72809	H	2007	Juv	POS	NEG	NA	TL17246	H	2008	Juv	POS	NEG	NEG
TK72810	H	2007	Adult	NA	NA	NA	TL17247	H	2008	Juv	POS	NEG	POS
TK72811	H	2007	Juv	POS	NEG	POS	TL17248	H	2008	Juv	NEG	NEG	POS
TK72812	H	2007	Juv	NA	NA	NEG	TL17249	H	2008	Juv	NEG	NEG	POS
TK72813	H	2007	Juv	POS	NEG	NA	TL17250	H	2008	Juv	POS	NEG	NA
TK72814	H	2007	Juv	NA	NA	NEG	TL17265	H	2008	Juv	NEG	NEG	NA
TK72815	H	2007	Juv	POS	NEG	NEG	TL17266	H	2008	Adult	NA	NA	NA
TK72816	H	2007	Juv	POS	NEG	NEG	TL17267	H	2008	Adult	POS	NEG	NA
TK72817	H	2007	Juv	NEG	NEG	NEG	TL17268	H	2008	Juv	POS	NEG	NA
TK72818	H	2007	Juv	POS	NEG	NEG	TL17269	H	2008	Juv	NEG	POS	NA
TK72819	H	2007	Juv	POS	NEG	NEG	TL17270	H	2008	Juv	POS	NEG	NA
TK72820	H	2007	Juv	NA	NA	NEG	TL17271	H	2008	Juv	POS	POS	NA
TK72821	H	2007	Juv	POS	POS	NA	TL17272	H	2008	Juv	POS	POS	NA
TK72822	H	2007	Juv	POS	NEG	NA	TL17273	H	2008	Juv	POS	POS	NA
TK72823	H	2007	Juv	POS	POS	NEG	TL17274	H	2008	Juv	POS	NEG	NA
TK72824	H	2007	Juv	POS	NEG	NA	TL17275	H	2008	Juv	NEG	NEG	NA
TK72825	H	2007	Juv	POS	NEG	NA	TL17276	H	2008	Juv	NA	NA	NA
TK72847	H	2007	Juv	POS	NEG	NEG	TL17277	H	2008	Juv	POS	NA	NA
TK72848	H	2007	Juv	POS	NEG	NEG	TL17278	H	2008	Juv	NA	NA	NA
TK72849	H	2007	Juv	POS	NEG	NEG	TJ43240	E	2008	Adult	POS	NEG	NA
TK72850	H	2007	Juv	NA	NA	POS	TJ43241	E	2008	Adult	POS	NEG	NA
TK72851	H	2007	Juv	POS	NA	NA	TJ43242	E	2008	Adult	POS	NEG	NEG
TK72852	H	2007	Juv	POS	NEG	NEG	TJ43243	E	2008	Adult	POS	NEG	NA
TK72853	H	2007	Juv	POS	POS	POS	TJ43244	E	2008	Adult	NEG	NEG	NEG
TK72854	H	2007	Juv	POS	NEG	POS	TJ43259	E	2008	Adult	POS	NEG	NA
TK72855	H	2007	Juv	POS	NEG	POS	TJ43260	E	2008	Adult	POS	NEG	NEG
TK72856	H	2007	Juv	POS	NEG	NEG	TL17089	E	2008	Adult	POS	NEG	NEG
TK72857	H	2007	Juv	NA	NA	POS	TL17215	E	2008	Adult	NEG	NEG	NA
TK72858	H	2007	Juv	POS	NA	NA	TL17216	E	2008	Adult	POS	NEG	NEG
TK72859	H	2007	Juv	NA	NA	NA	TL17217	E	2008	Adult	NEG	NEG	NA
TK72860	H	2007	Juv	POS	POS	NEG	TL17218	E	2008	Adult	POS	NEG	NA
TK72861	H	2007	Juv	POS	NEG	NA	TL17242	E	2008	Juv	POS	NEG	NA
TK72862	H	2007	Juv	POS	NEG	NA	TL17243	E	2008	Juv	NEG	NEG	NEG
TK72863	H	2007	Juv	POS	NEG	NA	TL17244	E	2008	Juv	NEG	POS	NEG
TK72864	H	2007	Juv	POS	NEG	NEG	TL17245	E	2008	Juv	NEG	POS	NA
TK72874	H	2007	Juv	NA	NA	NEG	TJ43155	I	2008	Adult	POS	POS	NEG
TK72875	H	2007	Adult	NA	NA	NEG	TJ43229	I	2008	Adult	NA	NA	NEG
TK72876	H	2007	Juv	NA	NA	NEG	TJ43230	I	2008	Adult	POS	POS	NA
TK72877	H	2007	Juv	NA	NA	POS	TJ43231	I	2008	Adult	POS	POS	NA
TK72878	H	2007	Juv	NA	NA	NEG	TJ43232	I	2008	Adult	POS	NEG	NA
TK72879	H	2007	Juv	NA	NA	NEG	TJ43233	I	2008	Adult	POS	NEG	NA
TK72880	H	2007	Juv	NA	NA	NEG	TJ43234	I	2008	Adult	POS	POS	NA
TK72881	H	2007	Juv	NA	NA	NA	TJ43235	I	2008	Adult	POS	NEG	NA
TH54159	E	2007	Adult	NEG	NEG	NA	TJ43273	I	2008	Adult	NEG	NEG	NA
TH54160	E	2007	Adult	NEG	POS	NA	TJ43274	I	2008	Adult	NEG	NEG	NA
TH54161	E	2007	Adult	NEG	NEG	NA	TJ43275	I	2008	Adult	POS	NEG	NEG
TH54162	E	2007	Adult	POS	NEG	NEG	TJ43277	I	2008	Adult	NEG	NEG	NA
TH54163	E	2007	Adult	NEG	NEG	NA	TJ43290	I	2008	Juv	POS	NEG	NA
TH54164	E	2007	Adult	NEG	NEG	NA	TK72803	I	2008	Adult	NEG	NEG	NEG
TH54185	E	2007	Adult	NEG	NEG	NEG	TL17019	I	2008	Juv	NEG	NEG	NEG
TH54186	E	2007	Adult	POS	NEG	NEG	TL17020	I	2008	Juv	NEG	NEG	NA
TJ43133	E	2007	Adult	POS	NEG	NA	TL17021	I	2008	Juv	NEG	NEG	NEG
TJ43135	E	2007	Adult	POS	NEG	NEG	TL17022	I	2008	Juv	POS	NEG	POS
TJ43136	E	2007	Adult	POS	POS	NEG	TL17023	I	2008	Juv	POS	NEG	POS
TJ43137	E	2007	Juv	NEG	POS	NEG	TL17088	I	2008	Adult	POS	NEG	NA
TJ43138	E	2007	Adult	POS	NEG	NA	TL17159	I	2008	Adult	NEG	NEG	NA
TJ43139	E	2007	Adult	POS	NEG	NA	TL17160	I	2008	Adult	NEG	NEG	NA
TJ43140	E	2007	Adult	NA	NA	NA	TL17259	I	2008	Juv	NA	NA	NA
TH54157	I	2007	Adult	NA	NA	NA	TL17261	I	2008	Juv	POS	NEG	NA
TH54158	I	2007	Adult	NA	NA	NEG	TL17262	I	2008	Juv	POS	POS	NA
TH54187	I	2007	Juv	POS	NEG	NEG	TL17263	I	2008	Juv	POS	NEG	NA
TH54188	I	2007	Juv	POS	POS	NEG	TL17264	I	2008	Juv	POS	NEG	NA
TH54189	I	2007	Juv	POS	POS	NEG	TJ43248	B	2008	Adult	NA	NA	NEG
TH54190	I	2007	Adult	NA	NA	NEG	TJ43249	B	2008	Adult	POS	NEG	NA
TH54191	I	2007	Juv	POS	POS	NEG	TJ43223	K	2008	Juv	POS	NEG	NA
TH54192	I	2007	Adult	POS	NEG	NEG	TJ43225	K	2008	Adult	POS	POS	NA
TH54194	I	2007	Juv	POS	NEG	NEG	TJ43252	K	2008	Adult	POS	NEG	NA
TH54195	I	2007	Juv	POS	NEG	NEG	TJ43253	K	2008	Adult	POS	NEG	NA
TH54196	I	2007	Juv	POS	POS	NEG	TJ43264	K	2008	Juv	POS	POS	NEG
TH54197	I	2007	Juv	NEG	POS	NEG	TJ43265	K	2008	Juv	POS	NEG	NA
TH54198	I	2007	Juv	NA	NA	NA	TJ43266	K	2008	Juv	POS	POS	NEG
TH54199	I	2007	Juv	POS	POS	NEG	TJ43267	K	2008	Juv	POS	NEG	NA
TH54200	I	2007	Juv	POS	NEG	NEG	TJ43268	K	2008	Juv	POS	POS	NA
TJ43010	I	2007	Juv	POS	POS	NEG	TJ43269	K	2008	Juv	POS	POS	NA
TJ43011	I	2007	Juv	NEG	POS	NEG	TJ43270	K	2008	Juv	POS	POS	NEG
TJ43012	I	2007	Juv	POS	POS	NEG	TJ43271	K	2008	Juv	POS	POS	NA
TJ43013	I	2007	Juv	POS	POS	NEG	TJ43272	K	2008	Adult	NEG	NEG	NEG
TJ43014	I	2007	Juv	POS	POS	NA	TL17201	K	2008	Adult	NEG	POS	NEG
TJ43015	I	2007	Juv	POS	NEG	NEG	TL17202	K	2008	Adult	NEG	POS	NEG
TJ43016	I	2007	Juv	POS	NEG	NA	TL17203	K	2008	Adult	POS	POS	NEG
TJ43153	I	2007	Adult	NEG	POS	NA	TL17252	K	2008	Juv	NEG	NEG	NA
TJ43154	I	2007	Adult	POS	NEG	NA	TL17253	K	2008	Juv	POS	NEG	NA
TJ43157	I	2007	Adult	POS	POS	NA	TL17254	K	2008	Juv	POS	NEG	NEG
TJ43183	I	2007	Adult	NA	NA	NEG	TL17255	K	2008	Juv	NEG	NEG	NEG
TJ43184	I	2007	Adult	NA	NA	NEG	TL17256	K	2008	Juv	POS	NEG	NA
TJ43185	I	2007	Adult	NEG	NEG	NEG	TL17258	K	2008	Juv	POS	NEG	NA
TJ43186	I	2007	Adult	POS	POS	NA	TL17024	G	2008	Juv	POS	POS	NA
TJ43187	I	2007	Adult	POS	POS	NEG	TL17025	G	2008	Juv	NA	NA	NEG
TK72801	I	2007	Adult	NEG	NEG	NA	TL17026	G	2008	Juv	NA	NA	NEG
TK72802	I	2007	Juv	POS	NEG	POS	TL17027	G	2008	Juv	POS	NEG	NA
TK72803	I	2007	Adult	NA	NA	NEG	TL17028	G	2008	Juv	POS	NEG	NEG
TK72804	I	2007	Juv	POS	POS	NA	TL17029	G	2008	Juv	POS	NEG	NEG
TK72828	I	2007	Adult	POS	NEG	NEG	TL17030	G	2008	Adult	NEG	NEG	NEG
TK72829	I	2007	Adult	NEG	POS	NEG	TL17031	G	2008	Adult	POS	POS	NA
TK72830	I	2007	Juv	POS	POS	NEG	TL17032	G	2008	Adult	NEG	NEG	NEG
TK72831	I	2007	Juv	POS	POS	NEG	TL17033	G	2008	Juv	POS	POS	NEG
TK72832	I	2007	Juv	POS	POS	NEG	TL17069	G	2008	Juv	POS	POS	NEG
TK72833	I	2007	Adult	POS	NEG	NEG	TL17093	G	2008	Adult	NEG	POS	NA
TK72834	I	2007	Adult	NEG	NEG	NEG	TL17094	G	2008	Adult	POS	NEG	NA
TK72835	I	2007	Adult	POS	POS	NEG	TL17222	G	2008	Adult	NEG	NEG	NA
TK72836	I	2007	Adult	POS	POS	NEG	TL17223	G	2008	Adult	POS	NEG	NEG
TK72844	I	2007	Juv	NEG	POS	NEG	TL17227	G	2008	Adult	NEG	NEG	NA
TK72845	I	2007	Juv	POS	POS	NEG	TL27224	G	2008	Adult	NEG	POS	NA
TK72846	I	2007	Juv	NA	NA	NEG	TL27226	G	2008	Adult	POS	POS	NA
TK72865	I	2007	Adult	NEG	POS	NEG	TL27228	G	2008	Adult	NEG	NEG	NA
TK72837	D	2007	Adult	NEG	NEG	NEG	TL17229	J	2008	Adult	POS	NEG	NA
TK72838	D	2007	Juv	POS	POS	NEG	TL17230	J	2008	Adult	POS	NA	NEG
TK72839	D	2007	Adult	NEG	POS	NEG	TJ43236	C	2008	Adult	NA	NA	NA
TK72840	D	2007	Adult	POS	NEG	NEG	TJ43237	C	2008	Adult	NEG	NEG	NEG
TK72841	D	2007	Adult	NA	NA	NEG	TJ43238	C	2008	Adult	NEG	NEG	NEG
TK72842	D	2007	Adult	POS	NEG	NEG	TJ43263	C	2008	Adult	POS	NEG	NEG
TK72843	D	2007	Adult	NEG	POS	NEG	TL17090	C	2008	Adult	POS	POS	NA
TJ43018	B	2007	Juv	NA	NA	NEG	TL17091	C	2008	Adult	POS	POS	NA
TJ43019	B	2007	Adult	NA	NA	NA	TL17092	C	2008	Adult	NEG	NEG	NA
TJ43020	B	2007	Juv	NA	NA	NEG	TL17237	C	2008	Adult	POS	POS	NEG
TJ43021	B	2007	Juv	NEG	POS	NA	TL17134	F	2009	Adult	POS	NEG	NA
TJ43023	B	2007	Juv	NEG	POS	NEG	TL17137	F	2009	Adult	POS	NEG	NEG
TJ43024	B	2007	Juv	NA	NA	NEG	TL17140	F	2009	Adult	POS	POS	NEG
TJ43025	B	2007	Juv	POS	NEG	NEG	TL17166	F	2009	Adult	POS	POS	NA
TJ43026	B	2007	Juv	POS	NEG	NEG	TL17167	F	2009	Adult	POS	POS	NEG
TJ43028	B	2007	Juv	POS	POS	NA	TL17168	F	2009	Adult	POS	NEG	NA
TJ43029	B	2007	Juv	POS	NEG	NA	TL17169	F	2009	Adult	POS	NA	NEG
TJ43030	B	2007	Juv	NA	NA	NA	TL17170	F	2009	Adult	POS	POS	NEG
TJ43031	B	2007	Juv	POS	NEG	NEG	TL17171	F	2009	Adult	POS	POS	NEG
TJ43032	B	2007	Juv	POS	NEG	NEG	TL17172	F	2009	Adult	POS	NEG	NA
TJ43033	B	2007	Adult	POS	NEG	NA	TL17173	F	2009	Adult	POS	NEG	NA
TJ43034	B	2007	Juv	POS	NEG	NA	TL17174	F	2009	Adult	POS	NEG	NA
TJ43035	B	2007	Juv	NEG	NEG	NEG	TL17181	F	2009	Juv	POS	POS	NEG
TJ43036	B	2007	Juv	NEG	NEG	POS	TL17182	F	2009	Juv	NEG	NEG	NA
TJ43037	B	2007	Juv	POS	NEG	POS	TL17183	F	2009	Juv	NA	NA	NEG
TJ43038	B	2007	Juv	POS	NEG	NEG	TL17184	F	2009	Adult	NEG	NEG	NA
TJ43047	B	2007	Juv	POS	POS	NA	TL17185	F	2009	Juv	POS	NEG	NA
TJ43049	B	2007	Adult	POS	POS	NA	TL17186	F	2009	Juv	POS	POS	NEG
TJ43060	B	2007	Juv	POS	POS	NA	TL17187	F	2009	Juv	NEG	POS	NA
TJ43068	B	2007	Juv	POS	NEG	NA	TL17188	F	2009	Juv	NEG	NEG	NEG
TJ43070	B	2007	Juv	NEG	POS	NA	TL17299	F	2009	Juv	POS	NEG	NEG
TJ43071	B	2007	Juv	NA	NA	NEG	TL17300	F	2009	Juv	NA	NEG	NEG
TJ43073	B	2007	Juv	NA	NA	NA	TL17200	A	2009	Juv	POS	NEG	NEG
TJ43074	B	2007	Juv	NEG	NEG	NA	TL17401	A	2009	Juv	POS	NEG	NEG
TJ43075	B	2007	Juv	NA	NA	NA	TL17402	A	2009	Juv	NEG	NEG	NEG
TJ43076	B	2007	Adult	NA	NA	NEG	TL17403	A	2009	Juv	POS	NEG	NEG
TJ43160	B	2007	Adult	POS	NEG	NA	TL17099	H	2009	Juv	NEG	NEG	NEG
TJ43162	B	2007	Adult	POS	NEG	NA	TL17176	H	2009	Adult	POS	POS	NEG
TJ43163	B	2007	Adult	POS	NEG	NA	TL17177	H	2009	Adult	POS	NEG	NEG
TJ43164	B	2007	Adult	POS	POS	NA	TL17178	H	2009	Adult	NA	NA	NEG
TJ43165	B	2007	Adult	POS	POS	NEG	TL17293	H	2009	Juv	NEG	NEG	NA
TJ43166	B	2007	Adult	POS	POS	NEG	TL17294	H	2009	Juv	POS	NEG	NEG
TJ43167	B	2007	Adult	POS	POS	NA	TL17295	H	2009	Juv	NEG	NEG	NEG
TH54017	K	2007	Adult	NA	NA	NA	TL17296	H	2009	Juv	POS	NEG	NEG
TH54076	K	2007	Adult	NA	NA	NA	TL19100	H	2009	Juv	POS	NEG	NEG
TH54078	K	2007	Adult	NA	NA	NEG	TL17096	E	2009	Adult	NA	NA	NEG
TH54128	K	2007	Adult	NA	NA	NA	TL17098	E	2009	Juv	POS	NEG	NEG
TH54134	K	2007	Adult	NA	NA	NA	TL17095	I	2009	Adult	POS	NEG	NA
TH54135	K	2007	Adult	NA	NA	POS	TL17199	I	2009	Juv	NA	NA	NA
TH54137	K	2007	Adult	NA	NA	POS	TL17097	K	2009	Juv	POS	NEG	NEG
TH54142	K	2007	Adult	NA	NA	NA	TL17298	K	2009	Juv	POS	NEG	NA
TH54143	K	2007	Adult	NA	NA	NEG	TL17189	G	2009	Juv	POS	NEG	NA
TH54144	K	2007	Adult	NA	NA	NA	TL17190	G	2009	Adult	NEG	POS	NA
TH54145	K	2007	Adult	NA	NA	NA	TL17191	G	2009	Juv	NEG	POS	NEG
TH54146	K	2007	Adult	NA	NA	POS	TL17192	G	2009	Juv	NEG	NEG	NEG
TH54147	K	2007	Adult	NA	NA	POS	TL17193	G	2009	Juv	POS	NEG	NEG
TH54148	K	2007	Adult	NA	NA	POS	TL17194	G	2009	Juv	NEG	POS	NA
TH54149	K	2007	Adult	NA	NA	POS	TL17195	G	2009	Juv	POS	POS	NA
TH54150	K	2007	Adult	NA	NA	NA	TL17196	G	2009	Juv	NEG	NEG	NA
TH54151	K	2007	Adult	NA	NA	POS	TL17197	G	2009	Juv	NEG	NEG	NEG
TH54152	K	2007	Adult	NA	NA	NA	TL17198	G	2009	Juv	NEG	NEG	NEG
TH54153	K	2007	Adult	NA	NA	POS	TL17297	C	2009	Adult	POS	NEG	NA
TH54154	K	2007	Adult	NA	NA	NA
